# Supplementary material for: miR-29b and miR-198 overexpression in CD8+ T cells of renal cell carcinoma patients down-modulates JAK3 and MCL-1 leading to immune dysfunction
Source: PubMed Central journal article supplement (PMC4827202; doi:10.1186/s12967-016-0841-9), 2016-04-11
Supplement: 12967_2016_841_MOESM1_ESM.pdf [file 12967_2016_841_MOESM1_ESM.pdf]

**Table S1****Down-regulated Genes in apoptosis dataset**

| Genes    | Exp Fold Change |
|----------|-----------------|
| ABCA1    | -1.362          |
| ABCC1    | -1.492          |
| ABCE1    | -1.304          |
| ABL1     | -1.337          |
| ACLY     | -1.361          |
| ACSL4    | -1.54           |
| ADAMTS1  | -1.469          |
| ADI1     | -1.371          |
| ADORA2B  | -1.45           |
| ADRBK1   | -1.659          |
| AIF1     | -1.344          |
| AIFM1    | -1.34           |
| AIM2     | -1.888          |
| ALDOA    | -1.328          |
| ANG      | -1.345          |
| ANP32A   | -1.329          |
| ANPEP    | -1.371          |
| ANXA6    | -1.448          |
| API5     | -1.318          |
| APOBEC3B | -4.661          |
| AREG     | -2.274          |
| ARG2     | -1.811          |
| ARHGDI1  | -1.649          |
| ARID3B   | -1.331          |
| ARNT     | -1.325          |
| ARRB1    | -1.321          |
| ARRB2    | -1.41           |
| ATAD2    | -3.018          |
| ATF2     | -1.47           |
| ATG7     | -1.304          |
| ATP2C1   | -1.419          |
| ATP7A    | -1.304          |
| ATXN3    | -1.315          |
| AURKA    | -2.785          |
| AURKB    | -2.792          |
| B4GALT5  | -1.377          |
| BAG3     | -1.442          |
| BCL10    | -1.833          |

| Genes   | Exp Fold Change |
|---------|-----------------|
| BCL2    | -1.368          |
| BHLHE40 | -2.184          |
| BIN1    | -1.303          |
| BIRC5   | -1.86           |
| BLM     | -1.352          |
| BLVRA   | -1.354          |
| BMI1    | -1.484          |
| BNIP1   | -1.375          |
| BNIP3   | -1.323          |
| BRCA1   | -2.842          |
| BRCA2   | -1.35           |
| BSG     | -1.855          |
| BUB1    | -1.88           |
| C1QBP   | -1.686          |
| CADM1   | -1.393          |
| CALR    | -1.384          |
| CANX    | -1.344          |
| CAPN1   | -1.41           |
| CAPN3   | -1.332          |
| CAPNS1  | -1.319          |
| CASP3   | -1.456          |
| CASP8   | -1.468          |
| CASP9   | -1.851          |
| CAST    | -1.383          |
| CBFB    | -1.737          |
| CBX4    | -1.538          |
| CBX5    | -1.362          |
| CCNA1   | -1.396          |
| CCNA2   | -2.235          |
| CCNB1   | -4.159          |
| CCNC    | -1.498          |
| CCND2   | -1.929          |
| CCND3   | -1.545          |
| CCR7    | -6.022          |
| CCR8    | -1.928          |
| CCT2    | -1.638          |
| CCT4    | -1.464          |
| CD164   | -1.301          |
| CD28    | -1.376          |
| CD33    | -1.56           |
| CD38    | -1.398          |

| Genes       | Exp Fold Change | Genes   | Exp Fold Change |
|-------------|-----------------|---------|-----------------|
| CD5         | -1.617          | CREM    | -1.386          |
| CD55        | -1.659          | CSE1L   | -1.502          |
| CD7         | -2.099          | CSNK2A1 | -1.426          |
| CD70        | -1.618          | CTBP1   | -1.457          |
| CD74        | -1.621          | CTH     | -1.507          |
| CD80        | -1.594          | CTSH    | -1.388          |
| CD9         | -1.563          | CUL4B   | -1.608          |
| CDC20       | -3.357          | CUL5    | -1.345          |
| CDC25A      | -1.757          | CXCL2   | -1.769          |
| CDC25C      | -1.386          | CXCL8   | -1.311          |
| CDC37       | -1.498          | CXCR3   | -1.313          |
| CDC42       | -1.656          | CXCR4   | -1.392          |
| CDC45       | -1.901          | CYCS    | -1.398          |
| CDC6        | -2.628          | CYP1B1  | -1.387          |
| CDC7        | -1.512          | DAPK3   | -1.378          |
| CDK1        | -2.605          | DCAF7   | -1.327          |
| CDK19       | -1.37           | DDX11   | -1.319          |
| CDK2        | -1.438          | DEDD    | -1.302          |
| CDK4        | -1.783          | DEPDC1  | -1.591          |
| CDKN2C      | -1.474          | DESI2   | -1.36           |
| CDKN3       | -2.55           | DHCR24  | -1.456          |
| CEBPD       | -1.338          | DHFR    | -1.496          |
| CENPA       | -1.374          | DHX9    | -1.437          |
| CENPE       | -2.31           | DMC1    | -1.448          |
| CENPF       | -1.716          | DNAJC15 | -1.372          |
| CENPJ       | -1.403          | DNM2    | -1.535          |
| CFH         | -1.363          | DNMT1   | -1.567          |
| CFLAR       | -1.368          | DTYMK   | -1.583          |
| CHEK1       | -2.457          | DUSP10  | -1.494          |
| CHEK2       | -1.387          | DUSP4   | -1.653          |
| CIT         | -2.247          | DUT     | -1.342          |
| CITED2      | -1.711          | E2F8    | -2.774          |
| CKAP2       | -1.623          | EAF2    | -1.674          |
| CKAP5       | -1.485          | ECT2    | -2.292          |
| CLASP1      | -1.564          | EGR3    | -1.364          |
| CLIC4       | -1.361          | EHD4    | -1.602          |
| COL18A1     | -1.309          | EHMT2   | -1.406          |
| COMMD3-BMI1 | -1.484          | EI24    | -1.327          |
| CORO1A      | -1.607          | EIF2AK2 | -1.404          |
| COX8A       | -1.317          | EIF4B   | -1.51           |
| CREB1       | -1.35           | EIF4E   | -1.759          |

| Genes         | Exp Fold Change |
|---------------|-----------------|
| EIF5A         | -2.619          |
| ELAVL1        | -1.324          |
| ELK1          | -1.324          |
| ELMO1         | -1.424          |
| ELOVL4        | -1.403          |
| ENO1          | -1.701          |
| ENTPD1        | -1.465          |
| EPAS1         | -1.392          |
| ESPL1         | -1.927          |
| ETS2          | -1.391          |
| ETV5          | -1.308          |
| EXO1          | -1.853          |
| EZR           | -1.389          |
| FAF1          | -1.542          |
| FAH           | -1.406          |
| FAIM          | -1.868          |
| FAM162A       | -1.387          |
| FANCA         | -1.405          |
| FASN          | -1.366          |
| FBL           | -1.579          |
| FBXO5         | -2.186          |
| FCGR3A/FCGR3B | -1.589          |
| FEM1B         | -1.344          |
| FEN1          | -2.101          |
| FES           | -1.406          |
| FGR           | -1.94           |
| FKBP1A        | -1.791          |
| FLI1          | -1.81           |
| FLNA          | -1.636          |
| FLNB          | -1.43           |
| FLOT2         | -1.516          |
| FLT3LG        | -2.093          |
| FN1           | -1.683          |
| FOS           | -1.633          |
| FOSB          | -1.303          |
| FXN           | -1.705          |
| GABBR1        | -1.888          |
| GADD45B       | -1.514          |
| GALNT10       | -1.539          |
| GAPDH         | -1.313          |
| GEM           | -1.454          |

| Genes    | Exp Fold Change |
|----------|-----------------|
| GFPT1    | -1.645          |
| GIN51    | -3.383          |
| GLS      | -1.315          |
| GLUD1    | -1.425          |
| GMDS     | -1.637          |
| GMFB     | -1.397          |
| GMNN     | -1.503          |
| GNA13    | -1.381          |
| GNAI2    | -1.683          |
| GNB2     | -1.398          |
| GNLY     | -2.431          |
| GPR132   | -1.52           |
| GPR18    | -1.33           |
| GPX4     | -1.377          |
| GRB10    | -1.591          |
| GRN      | -1.537          |
| GSR      | -1.444          |
| GSTP1    | -1.446          |
| H2AFX    | -2.316          |
| HELLS    | -2.359          |
| HIPK1    | -1.347          |
| HIPK3    | -1.356          |
| HLA-DMA  | -1.31           |
| HLA-G    | -1.425          |
| HLF      | -1.328          |
| HLTF     | -1.402          |
| HMGA1    | -1.498          |
| HMGB1    | -1.332          |
| HMG5     | -1.476          |
| HMMR     | -3.539          |
| HNRNPA1  | -1.461          |
| HNRNPC   | -1.3            |
| HPSE     | -1.332          |
| HSP90AA1 | -1.41           |
| HSP90AB1 | -1.594          |
| HSP90B1  | -1.341          |
| HSPA2    | -1.579          |
| HSPA4    | -1.32           |
| HSPD1    | -1.811          |
| HSPE1    | -1.355          |
| HTR2B    | -1.301          |

| Genes           | Exp Fold Change |
|-----------------|-----------------|
| HUS1            | -1.524          |
| HUWE1           | -1.311          |
| ICMT            | -1.464          |
| IER3            | -1.397          |
| IFT57           | -1.708          |
| IGF1            | -1.337          |
| IGF2R           | -1.539          |
| IL13            | -2.817          |
| IL15            | -1.41           |
| IL1A            | -2.44           |
| IL1B            | -1.36           |
| IL2RA           | -1.9            |
| IL5             | -2.689          |
| ILF3            | -1.348          |
| ING3            | -1.467          |
| INPP4A          | -1.501          |
| INVS            | -1.461          |
| IRF4            | -2.01           |
| IRF8            | -1.469          |
| ITCH            | -1.449          |
| ITGA4           | -1.526          |
| ITGAM           | -1.702          |
| ITGB1           | -1.322          |
| ITGB3BP         | -1.337          |
| ITPR1           | -1.499          |
| IVNS1ABP        | -1.421          |
| JAK2            | -1.431          |
| <b>JAK3</b>     | <b>-1.444</b>   |
| JUND            | -1.814          |
| KAT5            | -1.313          |
| KAT7            | -1.514          |
| KHDRBS1         | -1.466          |
| KIAA0101        | -2.801          |
| KIF11           | -2.56           |
| KIF14           | -2.946          |
| KIF18A          | -2.309          |
| KIF3A           | -1.472          |
| KIR2DL1/KIR2DL3 | -1.417          |
| KIR3DL1         | -1.409          |
| KIT             | -3.066          |
| KLF10           | -1.555          |

| Genes       | Exp Fold Change |
|-------------|-----------------|
| KLF11       | -1.943          |
| KLF2        | -1.684          |
| KLF4        | -1.604          |
| KLHL20      | -1.417          |
| KMT2A       | -1.365          |
| KPNA2       | -1.948          |
| LANCL1      | -1.308          |
| LDLR        | -1.454          |
| LEF1        | -1.442          |
| LEPR        | -1.775          |
| LGALS1      | -1.553          |
| LGALS8      | -1.317          |
| LIF         | -1.652          |
| LIG1        | -1.497          |
| LIN7C       | -1.444          |
| LMNA        | -1.379          |
| LMNB1       | -2.311          |
| LMO4        | -1.617          |
| LSP1        | -1.328          |
| LTA         | -1.796          |
| LYN         | -1.534          |
| LYPLA1      | -1.358          |
| MAD2L1      | -2.091          |
| MALT1       | -1.319          |
| MAN2C1      | -1.529          |
| MAP2K2      | -1.391          |
| MAP2K3      | -1.43           |
| MAP2K4      | -1.327          |
| MAP3K1      | -1.367          |
| MAPK13      | -1.423          |
| MAPK14      | -1.646          |
| MAPKAP1     | -1.326          |
| MAPKAPK2    | -1.49           |
| MBD4        | -1.412          |
| <b>MCL1</b> | <b>-1.342</b>   |
| MCM10       | -2.753          |
| MCM2        | -3.256          |
| MCTS1       | -1.393          |
| MDH1        | -1.398          |
| MEF2A       | -1.608          |
| MELK        | -1.974          |

| Genes  | Exp Fold Change |
|--------|-----------------|
| MIF    | -1.351          |
| MIS18A | -1.56           |
| MKI67  | -2.63           |
| MMP14  | -1.371          |
| MOB1A  | -1.667          |
| MRE11A | -1.642          |
| MRPS30 | -1.485          |
| MS4A1  | -1.428          |
| MSH2   | -1.695          |
| MSH5   | -1.755          |
| MSH6   | -1.377          |
| MSRB2  | -1.401          |
| MYB    | -6.222          |
| MYBL1  | -3.504          |
| MYBL2  | -1.564          |
| MYO6   | -1.308          |
| NAA15  | -1.552          |
| NAA35  | -1.538          |
| NAMPT  | -1.343          |
| NBN    | -1.354          |
| NCAPG2 | -3.183          |
| NCF2   | -1.337          |
| NCOA2  | -1.454          |
| NDUFV2 | -1.313          |
| NEDD9  | -1.307          |
| NET1   | -1.867          |
| NFYA   | -1.385          |
| NME1   | -1.774          |
| NME4   | -1.402          |
| NQO1   | -1.611          |
| NR3C2  | -1.561          |
| NR4A3  | -1.65           |
| NRAS   | -1.931          |
| NT5E   | -2.196          |
| NTRK2  | -1.462          |
| NUMB   | -1.312          |
| NUP62  | -1.557          |
| NUSAP1 | -1.898          |
| OGFOD1 | -1.402          |
| OPA1   | -1.612          |
| OSM    | -1.658          |

| Genes   | Exp Fold Change |
|---------|-----------------|
| P2RX4   | -1.391          |
| P4HB    | -1.977          |
| PA2G4   | -1.542          |
| PAK1    | -1.539          |
| PAK2    | -1.482          |
| PBK     | -3.638          |
| PCNA    | -1.941          |
| PCTP    | -1.304          |
| PDE4D   | -1.311          |
| PDGFD   | -1.801          |
| PECAM1  | -1.473          |
| PERP    | -1.999          |
| PF4     | -1.325          |
| PHB     | -2.353          |
| PIK3CB  | -1.322          |
| PIK3CG  | -1.732          |
| PIK3R2  | -1.482          |
| PKN2    | -1.371          |
| PLA2G16 | -1.357          |
| PLA2G4A | -1.682          |
| PLAC8   | -2.208          |
| PLAGL1  | -1.341          |
| PLK1    | -2.018          |
| PLK4    | -1.874          |
| PMAIP1  | -1.533          |
| PML     | -1.609          |
| PMS2    | -1.587          |
| POLR2A  | -1.341          |
| PON2    | -1.446          |
| PPARG   | -1.809          |
| PPID    | -1.648          |
| PPM1D   | -1.319          |
| PPP1CA  | -1.416          |
| PPP2R1B | -1.812          |
| PPP2R2B | -1.935          |
| PPP5C   | -1.467          |
| PPT1    | -1.336          |
| PRDX3   | -1.483          |
| PRDX4   | -1.519          |
| PRF1    | -1.607          |
| PRKAB1  | -1.337          |

| Genes   | Exp Fold Change |
|---------|-----------------|
| PRKAR1A | -1.893          |
| PRKCD   | -1.374          |
| PRKD3   | -1.405          |
| PRKDC   | -1.539          |
| PRMT1   | -1.648          |
| PRMT5   | -1.398          |
| PSAP    | -1.514          |
| PSEN1   | -1.494          |
| PSMB8   | -1.503          |
| PTGER4  | -1.54           |
| PTGIS   | -2.163          |
| PTK2B   | -1.706          |
| PTK6    | -1.339          |
| PTPN11  | -1.623          |
| PTPN13  | -1.31           |
| PTTG1   | -1.58           |
| PXN     | -1.763          |
| QKI     | -1.341          |
| RAB27A  | -1.377          |
| RABGGTB | -1.363          |
| RAC2    | -1.683          |
| RACGAP1 | -2.109          |
| RAD21   | -1.391          |
| RAD23B  | -1.362          |
| RAD50   | -1.3            |
| RAD51   | -2.833          |
| RALB    | -1.341          |
| RANBP1  | -1.632          |
| RASA1   | -1.383          |
| RASA4   | -1.573          |
| RB1     | -1.511          |
| RBBP4   | -1.333          |
| RBL1    | -1.514          |
| RBM25   | -1.351          |
| RDX     | -1.41           |
| REL     | -1.713          |
| RELA    | -1.519          |
| RFC1    | -1.331          |
| RGS3    | -1.38           |
| RHOB    | -1.841          |
| RHOC    | -1.589          |

| Genes    | Exp Fold Change |
|----------|-----------------|
| RLN2     | -1.576          |
| RNF130   | -1.805          |
| RPLP0    | -1.323          |
| RRAS2    | -1.379          |
| RRBP1    | -1.591          |
| RRM1     | -2.034          |
| RRM2     | -4.902          |
| RRN3     | -1.324          |
| RSL1D1   | -1.44           |
| RTN4     | -1.488          |
| RUNX3    | -1.447          |
| RUVBL2   | -1.426          |
| RXRA     | -1.344          |
| RYBP     | -1.317          |
| S100A8   | -1.876          |
| S1PR1    | -2.621          |
| S1PR4    | -1.334          |
| SAR1A    | -1.46           |
| SCD      | -1.303          |
| SDC4     | -1.743          |
| SDHC     | -1.589          |
| SELL     | -1.716          |
| SERPINA1 | -1.343          |
| SERPINB9 | -1.347          |
| SERPINE2 | -1.817          |
| SERPINI1 | -1.385          |
| SET      | -1.337          |
| SGK1     | -2.521          |
| SGMS1    | -1.463          |
| SGPP1    | -1.455          |
| SHC1     | -2.028          |
| SIAH1    | -1.624          |
| SIRT1    | -1.42           |
| SKP2     | -1.864          |
| SLC25A6  | -1.474          |
| SLC2A1   | -1.549          |
| SLC2A3   | -1.717          |
| SLC6A6   | -1.607          |
| SMAD2    | -1.447          |
| SMAD7    | -1.818          |
| SMARCA2  | -1.305          |

| Genes     | Exp Fold Change |
|-----------|-----------------|
| SMARCA5   | -1.306          |
| SMARCC1   | -1.365          |
| SMN1/SMN2 | -1.69           |
| SOAT1     | -1.744          |
| SOCS1     | -1.321          |
| SOCS2     | -1.707          |
| SORT1     | -1.485          |
| SOX4      | -1.513          |
| SPAG5     | -2.806          |
| SPC25     | -2.744          |
| SPINT2    | -1.568          |
| SPOCK1    | -3.713          |
| SPP1      | -1.893          |
| SPTBN1    | -1.364          |
| SREBF1    | -1.4            |
| SREBF2    | -1.591          |
| SRPK1     | -1.482          |
| SRRT      | -1.477          |
| SRSF1     | -1.576          |
| SRSF2     | -1.327          |
| SSRP1     | -1.694          |
| STAT1     | -1.525          |
| STAT3     | -1.325          |
| STAT5B    | -1.357          |
| STIL      | -2.521          |
| STIP1     | -1.348          |
| STK17B    | -1.431          |
| STK26     | -1.505          |
| STK3      | -1.32           |
| STMN1     | -1.419          |
| SUN1      | -1.357          |
| SWAP70    | -1.447          |
| SYCP2     | -1.573          |
| TAF9B     | -1.364          |
| TAGLN2    | -1.881          |
| TCEB1     | -1.606          |
| TCEB3     | -1.385          |
| TCERG1    | -1.336          |
| TCF4      | -1.309          |
| TCF7L2    | -1.458          |
| TCP1      | -1.358          |

| Genes     | Exp Fold Change |
|-----------|-----------------|
| TFAM      | -1.325          |
| TFDP1     | -1.523          |
| TFDP2     | -1.426          |
| TFRC      | -1.513          |
| TGFB1     | -2.053          |
| TGFB2     | -1.359          |
| TGFBR1    | -1.352          |
| TGFBR3    | -2.025          |
| THG1L     | -1.343          |
| TJP2      | -2.115          |
| TK1       | -2.042          |
| TMOD3     | -1.579          |
| TMX1      | -1.498          |
| TNFRSF10B | -1.398          |
| TNFRSF4   | -3.199          |
| TNFRSF8   | -2.498          |
| TNFRSF9   | -1.794          |
| TNFSF9    | -1.338          |
| TOP1      | -1.379          |
| TOP2A     | -5.487          |
| TOPBP1    | -1.597          |
| TOPORS    | -1.364          |
| TP53      | -1.611          |
| TP53I3    | -1.429          |
| TPD52     | -1.326          |
| TPX2      | -2.24           |
| TREX2     | -1.513          |
| TRIB1     | -2.446          |
| TRPC1     | -1.619          |
| TSC22D3   | -1.338          |
| TTK       | -3.782          |
| TXK       | -1.546          |
| TXN2      | -1.436          |
| TYMS      | -3.511          |
| TYROBP    | -2.173          |
| UBD       | -1.888          |
| UBE2M     | -2.115          |
| UBE2V1    | -1.323          |
| UBE2V2    | -1.467          |
| UBE4B     | -1.312          |
| UCP2      | -1.595          |

| <b>Genes</b> | <b>Exp Fold Change</b> |
|--------------|------------------------|
| ULK2         | -1.463                 |
| UNG          | -1.324                 |
| UPF1         | -1.307                 |
| USP10        | -1.434                 |
| USP12        | -1.322                 |
| VASP         | -1.707                 |
| VAV3         | -1.319                 |
| VCAN         | -1.541                 |
| VCL          | -2.039                 |
| VDAC1        | -1.375                 |
| VEGFA        | -1.575                 |
| VIM          | -1.377                 |
| WAPL         | -1.412                 |
| WDR48        | -1.38                  |
| WEE1         | -1.882                 |
| WHSC1        | -1.386                 |
| WWOX         | -1.531                 |
| XCL1         | -1.765                 |
| YBX1         | -1.476                 |
| YBX3         | -2.697                 |
| YME1L1       | -1.381                 |
| YWHAE        | -1.988                 |
| YWHAQ        | -1.346                 |
| YWHAZ        | -1.369                 |
| YY1          | -1.334                 |
| ZEB1         | -1.381                 |
| ZFP36L2      | -1.948                 |



## Up-regulated Genes in apoptosis dataset

| Genes   | Exp Fold Change |
|---------|-----------------|
| ADAM8   | 1.477           |
| ADCK3   | 1.303           |
| ADORA2A | 1.313           |
| AGA     | 1.346           |
| AHI1    | 1.325           |
| AKTIP   | 2.066           |
| ALK     | 1.366           |
| ALMS1   | 1.333           |
| AMFR    | 1.546           |
| ANGPTL4 | 1.39            |
| APBB3   | 1.366           |
| APC     | 1.423           |
| AQP3    | 2.545           |
| ARHGEF3 | 1.423           |
| ARIH2   | 1.348           |
| ATF5    | 1.431           |
| ATG5    | 1.508           |
| AZU1    | 1.311           |
| B4GALT1 | 1.306           |
| BCL2A1  | 1.327           |
| BCL6    | 1.337           |
| BMP1    | 1.365           |
| BMP7    | 1.362           |
| BRF1    | 1.528           |
| BRMS1   | 1.321           |
| BTG2    | 2.05            |
| C3AR1   | 1.985           |
| CACFD1  | 1.34            |
| CACNA1A | 1.301           |
| CACNA1C | 1.343           |
| CAPNG   | 1.327           |
| CAPRN2  | 1.415           |
| CASP4   | 1.501           |
| CBLB    | 1.379           |
| CCKBR   | 1.357           |
| CCL2    | 1.316           |
| CCL5    | 1.329           |
| CCNL2   | 1.499           |
| CCR2    | 2.099           |
| CCR5    | 1.8             |

| Genes   | Exp Fold Change |
|---------|-----------------|
| CD2     | 1.535           |
| CD44    | 1.426           |
| CD47    | 1.32            |
| CD59    | 1.414           |
| CD69    | 1.775           |
| CDCP1   | 1.376           |
| CDK11A  | 1.319           |
| CDKN1C  | 1.328           |
| CEACAM1 | 1.335           |
| CEBPB   | 1.67            |
| CERS6   | 1.331           |
| CLN8    | 1.336           |
| CLU     | 1.518           |
| CREBL2  | 1.305           |
| CSF2RB  | 1.526           |
| CSK     | 1.386           |
| CSTB    | 1.499           |
| CTSB    | 1.66            |
| CX3CL1  | 1.367           |
| CYLD    | 1.323           |
| CYP2E1  | 1.366           |
| CYP3A4  | 1.344           |
| DAD1    | 1.31            |
| DAO     | 1.333           |
| DCT     | 1.336           |
| DDAH2   | 1.352           |
| DDX17   | 1.334           |
| DFFB    | 1.498           |
| DGCR8   | 1.408           |
| DHX58   | 1.356           |
| DICER1  | 1.343           |
| DIDO1   | 1.358           |
| DNAJC3  | 1.399           |
| DNM1    | 1.346           |
| DPP4    | 1.308           |
| DRD2    | 1.346           |
| DUSP6   | 1.312           |
| DYNLL1  | 1.429           |
| E2F3    | 1.343           |
| E2F6    | 1.392           |
| EDA     | 1.311           |

| Genes         | Exp Fold Change |
|---------------|-----------------|
| EEF1D         | 1.4             |
| EGLN3         | 1.688           |
| EGR1          | 2.498           |
| EHD1          | 1.323           |
| EPO           | 1.542           |
| EPOR          | 1.461           |
| FANCF         | 1.336           |
| FBLN1         | 1.398           |
| FBN1          | 1.592           |
| FCGR1A        | 1.393           |
| FCMR          | 1.92            |
| FGFR2         | 1.392           |
| FIS1          | 1.373           |
| FNIP1         | 1.504           |
| FOXO1         | 1.316           |
| FOXO3         | 1.306           |
| FUBP1         | 1.37            |
| FXR1          | 1.422           |
| GADD45G       | 1.367           |
| GAS6          | 1.309           |
| GDF2          | 1.314           |
| GDF5          | 1.341           |
| GIMAP1-GIMAP5 | 1.439           |
| GIMAP4        | 2.195           |
| GIMAP5        | 1.439           |
| GJB1          | 1.307           |
| GLIPR1        | 1.353           |
| GLO1          | 1.394           |
| GLRX          | 1.343           |
| GNAS          | 1.366           |
| GPR65         | 1.386           |
| GRIN1         | 1.344           |
| GRIN2B        | 1.401           |
| GRM4          | 1.335           |
| GSN           | 1.377           |
| HAND2         | 1.351           |
| HAP1          | 1.323           |
| HAS1          | 1.311           |
| HBEGF         | 1.473           |
| HDAC4         | 1.434           |
| HFE           | 1.32            |

| Genes         | Exp Fold Change |
|---------------|-----------------|
| HIP1R         | 1.368           |
| HPCA          | 1.369           |
| HSPA1A/HSPA1B | 1.591           |
| HTATIP2       | 1.659           |
| HUNK          | 1.303           |
| ID2           | 1.652           |
| IGHG1         | 1.349           |
| IGHM          | 1.349           |
| IKBKB         | 1.435           |
| IKZF1         | 1.376           |
| IL10RA        | 1.512           |
| IL17RB        | 1.444           |
| IL1RN         | 1.406           |
| INHA          | 1.404           |
| INHBA         | 1.302           |
| INPP5E        | 1.391           |
| IRF7          | 1.978           |
| ISG15         | 1.406           |
| ITGA1         | 1.643           |
| ITIH4         | 1.414           |
| ITM2B         | 1.3             |
| ITPR2         | 1.326           |
| ITPR3         | 1.354           |
| JAG2          | 1.535           |
| JAK1          | 1.332           |
| JUN           | 1.495           |
| KAT2B         | 1.53            |
| KIF1C         | 1.474           |
| KIFC3         | 1.427           |
| KSR1          | 1.332           |
| LAMA1         | 1.368           |
| LAMA3         | 1.512           |
| LAMA4         | 1.395           |
| LGALS3BP      | 1.426           |
| LIMS1         | 1.509           |
| LIMS2         | 1.403           |
| LMO2          | 1.328           |
| LRP5          | 1.552           |
| LTBR          | 1.469           |
| LYL1          | 1.339           |
| MAP4          | 1.317           |

| Genes    | Exp Fold Change | Genes    | Exp Fold Change |
|----------|-----------------|----------|-----------------|
| MAP4K1   | 1.307           | PDGFB    | 1.344           |
| MAP4K4   | 1.322           | PDHA1    | 1.374           |
| MAPK11   | 1.315           | PDIA2    | 1.381           |
| MAPT     | 1.352           | PDLIM7   | 1.37            |
| MBOAT7   | 1.344           | PDPK1    | 1.355           |
| MCOLN3   | 1.618           | PGR      | 1.328           |
| MEF2C    | 1.44            | PHF1     | 1.388           |
| MGEA5    | 1.31            | PHOX2B   | 1.474           |
| MGMT     | 1.34            | PIAS3    | 1.492           |
| MICAL1   | 1.691           | PIK3CD   | 1.302           |
| mir-21   | 1.486           | PIK3IP1  | 1.421           |
| mir-22   | 1.952           | PINK1    | 1.634           |
| MMP2     | 1.464           | PITPNA   | 1.49            |
| MPZ      | 1.353           | PKD2L2   | 1.503           |
| MSH3     | 1.439           | PKM      | 1.858           |
| MSR1     | 1.312           | PMEPA1   | 1.309           |
| MTOR     | 1.321           | POU3F1   | 1.34            |
| MZF1     | 1.309           | PPIF     | 1.323           |
| NCAM1    | 1.335           | PPM1A    | 1.303           |
| NCK1     | 1.375           | PPP1R13L | 1.555           |
| NCOA3    | 1.324           | PPP2R5C  | 1.468           |
| NEK1     | 1.337           | PQBP1    | 1.33            |
| NFIL3    | 1.339           | PRDM16   | 1.529           |
| NGFRAP1  | 1.342           | PRDX2    | 1.387           |
| NOL3     | 1.433           | PRKCG    | 1.319           |
| NQO2     | 1.769           | PRKCZ    | 1.338           |
| NR1D1    | 1.351           | PRMT2    | 1.382           |
| NR1H3    | 1.749           | PTGER2   | 1.377           |
| NR2F1    | 1.442           | PTGS2    | 2.2             |
| NRP1     | 2.364           | PTPN22   | 1.311           |
| NUMA1    | 1.343           | RAB28    | 1.39            |
| NUPR1    | 1.312           | RAD9A    | 1.307           |
| OGT      | 1.451           | RARB     | 1.455           |
| OPTN     | 1.312           | RASGRP1  | 1.614           |
| OSGIN1   | 1.378           | RBCK1    | 1.38            |
| PAFAH1B1 | 1.375           | RBL2     | 1.494           |
| PAM16    | 1.386           | RBM3     | 1.45            |
| PCBP4    | 1.595           | RBM5     | 1.302           |
| PDCD2    | 1.399           | RBX1     | 1.398           |
| PDCD4    | 1.327           | RGS4     | 1.341           |
| PDE4A    | 1.358           | RNF5     | 1.403           |

| Genes   | Exp Fold Change | Genes    | Exp Fold Change |
|---------|-----------------|----------|-----------------|
| RPS6KA2 | 1.369           | TBX5     | 1.328           |
| RPS6KA5 | 1.472           | TBXA2R   | 1.339           |
| S100B   | 1.357           | TCF3     | 1.571           |
| SAA1    | 1.356           | TDRD7    | 1.359           |
| SCRIB   | 1.4             | TFEB     | 1.365           |
| SDC2    | 1.489           | TFR2     | 1.5             |
| SEMA4D  | 1.537           | TGFB3    | 1.468           |
| SFN     | 1.348           | TGM1     | 1.404           |
| SFRP4   | 1.345           | THRA     | 1.351           |
| SFTPC   | 1.42            | TIA1     | 1.322           |
| SH3BP2  | 1.335           | TIAL1    | 1.353           |
| SHBG    | 1.329           | TIAM1    | 2.351           |
| SIM2    | 1.397           | TIMP1    | 1.569           |
| SKIL    | 1.471           | TNFRSF1A | 1.371           |
| SLAMF1  | 1.375           | TNFSF10  | 1.688           |
| SLC18A3 | 1.329           | TNFSF12  | 1.328           |
| SLC1A3  | 1.332           | TNFSF13  | 1.328           |
| SLC4A3  | 1.379           | TNFSF8   | 1.526           |
| SLC4A7  | 1.324           | TPM1     | 1.43            |
| SLC9A1  | 1.328           | TRADD    | 1.31            |
| SMAD3   | 1.586           | TRAF5    | 1.378           |
| SMAD6   | 1.338           | TTN      | 1.323           |
| SMOX    | 1.331           | UBA3     | 1.372           |
| SNCA    | 1.307           | UBASH3A  | 1.384           |
| SOX10   | 1.307           | UBE2I    | 1.472           |
| SPDEF   | 1.415           | UBR4     | 1.321           |
| SPN     | 1.366           | USE1     | 1.348           |
| SQSTM1  | 1.306           | USP18    | 1.431           |
| SRC     | 1.355           | VASH1    | 1.33            |
| SRF     | 1.348           | VOPP1    | 1.459           |
| SRPK2   | 1.327           | VPS13A   | 1.337           |
| SSTR1   | 1.355           | WSB1     | 1.315           |
| SSTR2   | 1.328           | WWP2     | 1.307           |
| ST14    | 1.304           | XAF1     | 1.33            |
| ST6GAL1 | 1.526           | XBP1     | 1.468           |
| ST8SIA1 | 5.653           | XPC      | 1.333           |
| SURF1   | 1.315           | ZBTB16   | 1.356           |
| SYNE1   | 1.409           | ZHX2     | 1.305           |
| TAB2    | 1.487           | ZNF10    | 1.44            |
| TAOK1   | 1.508           |          |                 |
| TARDBP  | 1.393           |          |                 |
