# Supplementary material for: miR-29b and miR-198 overexpression in CD8+ T cells of renal cell carcinoma patients down-modulates JAK3 and MCL-1 leading to immune dysfunction
Source: PubMed Central journal article supplement (PMC4827202; doi:10.1186/s12967-016-0841-9), 2016-04-11
Supplement: 12967_2016_841_MOESM2_ESM.pdf [file 12967_2016_841_MOESM2_ESM.pdf]

### MCL1 RQ

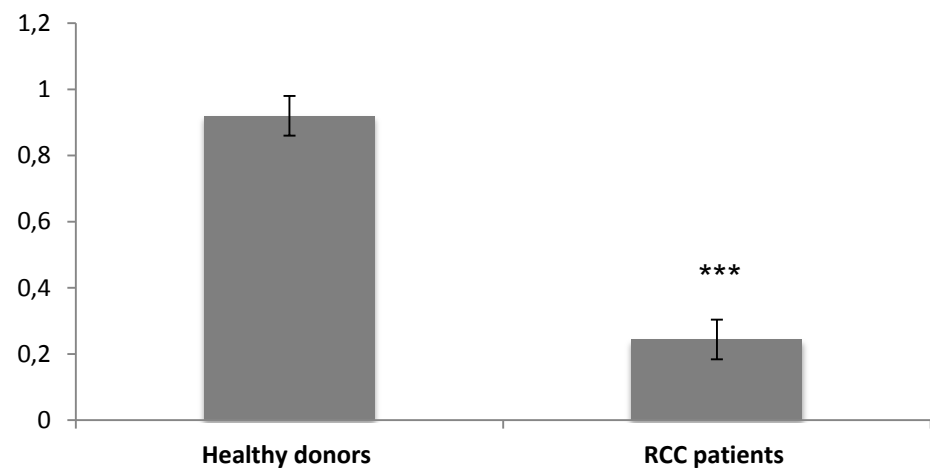

### JAK3 RQ

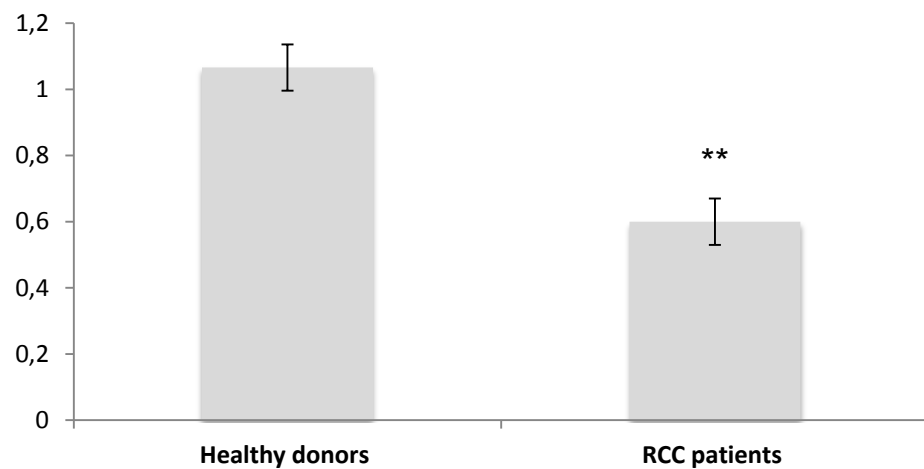

Figure S2
